# Supplementary material for: Primary School Educators’ Perspectives and Experiences of Nature-Based Play and Learning and Its Benefits, Barriers, and Enablers: A Qualitative Descriptive Study
Source: MDPI journal article supplement (doi:10.3390/ijerph19063179), 2022-03-08
Supplement: s1 [file s1]

## Interview guide

**Overarching question: What are South Australian school staffs' perspectives and experiences of the benefits, barriers and enablers of nature-based play and learning?**

| Topic                                          | Prompts/ questions                                                                                                                                                                                                                                                                        |
|------------------------------------------------|-------------------------------------------------------------------------------------------------------------------------------------------------------------------------------------------------------------------------------------------------------------------------------------------|
| The practice of nature-based play and learning | How is nature-based play used at your school?<br>How is nature-based learning used at your school?<br>Who uses nature-based play and learning at your school?<br>What spaces are used for nature-based play and learning?<br>Are these spaces natural or purpose-built?                   |
| Benefits                                       | Have you experienced any benefits of nature-based play and learning for your students/school/self? If so, what were they?                                                                                                                                                                 |
| Barriers/ challenges                           | Have you experienced any consequences of using nature-based play and learning? If so, what were they?<br>Have you experienced any barriers to using nature-based play and learning? If so, what were they?<br>How have you overcome these barriers/ how could these barriers be overcome? |
| Enablers                                       | What has enabled you to engage your students in nature-based play and learning?                                                                                                                                                                                                           |
| Resources                                      | Do you use the Nature Play SA Educators' Membership?<br>If so, is it useful? Why/ why not<br>Where do you get your inspiration and ideas for nature-based play and learning?<br>What would an ideal nature-based play and learning resource provide?                                      |
| Recommendations                                | What is your advice for other schools who want to implement nature-based play and learning?                                                                                                                                                                                               |
| Wrap up                                        | Is there anything else you would like to add?                                                                                                                                                                                                                                             |
